**P883**

Beringuilho M.; Baptista A.; Baltazar J.; Faria D.; Magno P.; Freitas A.; Simoes J.  
Hospital Prof Fernando da Fonseca EPE, Amadora, Portugal

**Discussion:** Intravascular tumor extension, also known as Tumor thrombus (TT) is a rare complication of some forms of cancer. In the late stages of Hepatocellular carcinoma (HCC) a TT can form in the portal or hepatic vein. These are usually detected during tumor workup or during evaluation of cardiorespiratory symptoms in a patient with a known abdominal carcinoma. Tumor invasion to the portal system is quite common while invasion to the inferior vena cava (IVC) and/or heart without invasion of the portal system is rare. Tumor extension to the RA or IVC, most patients were either symptomatic, had cirrhosis, or both. Our patient presented mainly with signs of right heart failure refractory to medical treatment and had no signs of portal invasion or hypertension in the various image modalities. The prognosis for a HCC with extension to the IVC or RA is grim, with a 1 to 4 months of mean survival regardless of treatment choice.

Abstract P883 Figure.

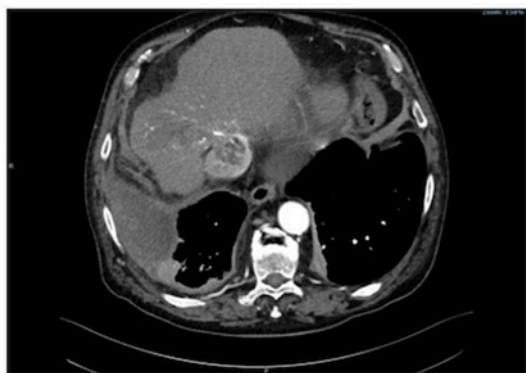

**Figure 1**

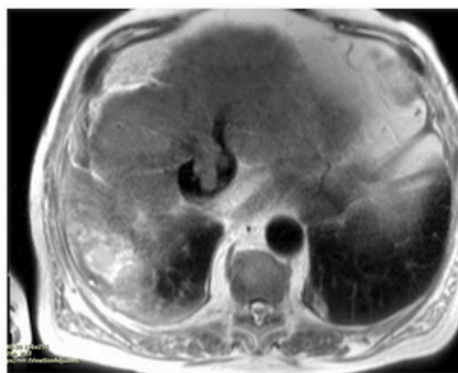

**Figure 2**
